# Supplementary material for: Direct Chloroplast Sequencing: Comparison of Sequencing Platforms and Analysis Tools for Whole Chloroplast Barcoding
Source: PubMed Central journal article supplement (PMC4201551; doi:10.1371/journal.pone.0110387), 2014-10-17
Supplement: pone.0110387.s001.pdf [file pone.0110387.s001.pdf]

**Supplementary Table S1.** Summary statistics of raw reads obtained from PGM Ion Torrent and Illumina platforms for rice (*Oryza sativa* spp. *japonica* var. Nipponbare) and wild rice (*Oryza rufipogon*-like plant from Australia). Quality distribution is represented as PHRED scores.

|                                                          | <b>Num. of reads</b>    | <b>Approach</b>  | <b>Length<br/>distribution</b> | <b>Length<br/>avg.</b> | <b>GC avg.<br/>[%]</b> | <b>Quality<br/>distribution</b> | <b>Quality<br/>avg.</b> |
|----------------------------------------------------------|-------------------------|------------------|--------------------------------|------------------------|------------------------|---------------------------------|-------------------------|
| <i>Oryza sativa</i> spp. <i>japonica</i> var. Nipponbare |                         |                  |                                |                        |                        |                                 |                         |
| PGM Ion Torrent                                          | 6,655,114               | Single reads     | 8-376                          | 204                    | 41.2                   | 8-35                            | 26                      |
| GAI Illumina [11]                                        | 9,689,084               | Paired-end reads | 36                             | 36                     | 46.3                   | 2-34                            | 29                      |
|                                                          | (4,844,542 each pair)   |                  |                                |                        |                        |                                 |                         |
| Wild rice ( <i>Oryza rufipogon</i> -like)                |                         |                  |                                |                        |                        |                                 |                         |
| PGM Ion Torrent                                          | 5,732,260               | Single reads     | 8-362                          | 189                    | 41.3                   | 6-36                            | 25                      |
| HiSeq Illumina                                           | 390,365,066             | Paired-end reads | 100                            | 100                    | 41.5                   | 2-40                            | 32                      |
|                                                          | (195,182,533 each pair) |                  |                                |                        |                        |                                 |                         |
