# Supplementary material for: Direct Chloroplast Sequencing: Comparison of Sequencing Platforms and Analysis Tools for Whole Chloroplast Barcoding
Source: PubMed Central journal article supplement (PMC4201551; doi:10.1371/journal.pone.0110387), 2014-10-17
Supplement: pone.0110387.s002.pdf [file pone.0110387.s002.pdf]

**Supplementary Table S2.** Mapping statistics of CLC trimmed reads from Illumina and PGM Ion Torrent platforms.

|                          | <i>Oryza sativa</i> spp. <i>japonica</i> |                   | Wild rice                     |                       |                 |
|--------------------------|------------------------------------------|-------------------|-------------------------------|-----------------------|-----------------|
|                          | var. <i>Nipponbare</i>                   |                   | <i>(Oryza rufipogon-like)</i> |                       |                 |
|                          | GAll Illumina                            | PGM Ion Torrent   | HiSeq Illumina                | HiSeq Illumina subset | PGM Ion Torrent |
| Mapped reads             | 525,452                                  | 223,605           | 12,424,965                    | 327,403               | 169,665         |
| (Forward/Reversed)       | (262,567/262,885)                        | (112,154/111,451) | (6,211,497/6,213,468)         | (164,024/163,898)     | (85,317/84,348) |
| % mapped reads           | 5.42                                     | 3.39              | 3.43                          | 3.46                  | 3.17            |
| Non-specific matches     | 204,877                                  | 64,560            | 3,601,138                     | 93,502                | 50,521          |
| (% non-specific matches) | (39.9)                                   | (28.9)            | (29.0)                        | (28.5)                | (29.8)          |
| Non-perfect matches      | 18,385                                   | 164,176           | 1,745,820                     | 47,444                | 130,855         |
| (% non-perfect matches)  | (3.5)                                    | (73.4)            | (14.1)                        | (14.5)                | (77.1)          |
| Min coverage             | 7                                        | 96                | 1,203                         | 75                    | 69              |
| Max coverage             | 688                                      | 534               | 13,231                        | 360                   | 431             |
| Average coverage         | 127.7                                    | 333.4             | 8,143.2                       | 218.4                 | 243.6           |
| % GC                     | 39                                       | 39                | 39                            | 39                    | 39              |
| Consensus length         | 134,551                                  | 134,520           | 134,531                       | 134,529               | 134,525         |
