# Supplementary material for: Direct Chloroplast Sequencing: Comparison of Sequencing Platforms and Analysis Tools for Whole Chloroplast Barcoding
Source: PubMed Central journal article supplement (PMC4201551; doi:10.1371/journal.pone.0110387), 2014-10-17
Supplement: pone.0110387.s003.pdf [file pone.0110387.s003.pdf]

**Supplementary Table S3.** Assembly results performed on CLC Genomic Workbench and Torrent Suite Software of reads from Illumina and Ion Torrent platforms and mapping results of generated contigs to chloroplast reference-sequence.

| Sequencing platform                                      | Assembly method    | Assembly tool | Overall number of contigs | Contigs mapped to chloroplast genome <sup>±</sup> | Contigs chosen to create consensus sequence |
|----------------------------------------------------------|--------------------|---------------|---------------------------|---------------------------------------------------|---------------------------------------------|
| <i>Oryza sativa</i> spp. <i>japonica</i> var. Nipponbare |                    |               |                           |                                                   |                                             |
| GAI Illumina                                             | <i>de novo</i>     | CLC-GW        | 961                       | 25                                                | NA                                          |
| PGM Ion Torrent                                          | <i>de novo</i>     | CLC-GW        | 268,869                   | 116                                               | 25                                          |
| PGM Ion Torrent                                          | reference-assisted | Torrent Suite | 213*                      | 34                                                | 2                                           |
| <i>Wild rice (Oryza rufipogon-like)</i>                  |                    |               |                           |                                                   |                                             |
| HiSeq Illumina                                           | <i>de novo</i>     | CLC-GW        | 224,756                   | 94                                                | NA                                          |
| PGM Ion Torrent                                          | <i>de novo</i>     | CLC-GW        | 227,610                   | 99                                                | 19                                          |
| PGM Ion Torrent                                          | reference-assisted | Torrent Suite | 222*                      | 31                                                | 2                                           |

NA – not applicable, corresponds to method that could not be used to create consensus sequence because of the gaps between contigs and reference genome, detailed description in the text;

\* - in Torrent Suite Software the assembly was run in the reference-assisted mode using chloroplast reference and the number of contigs given corresponds to contigs assembled based on the chloroplast sequence not the entire genome;

<sup>±</sup> - numbers correspond to all contigs mapped to the reference genome by means of MUMmer with default parameters and all matches regardless of their uniqueness, duplicated contigs are not reported.
